# Supplementary material
Source: PubMed Central journal article supplement (PMC3509807)
Supplement: NIHMS420880-supplement-2_si_002.pdf [file NIHMS420880-supplement-2_si_002.pdf]

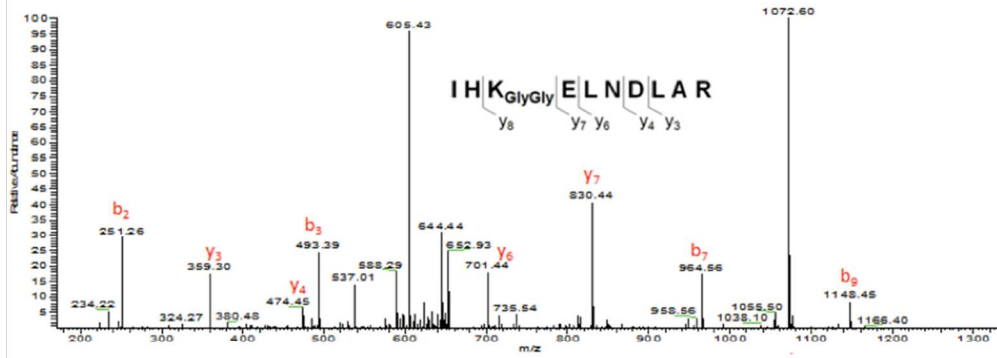

Supporting Figure 2 –  
 Product ion spectrum for the doubly charged ubiquitinated peptide IHK<sub>GlyGly</sub>ELNDLAR.

341x215mm (96 x 96 DPI)
