# Supplementary material
Source: PubMed Central journal article supplement (PMC3509807)
Supplement: NIHMS420880-supplement-3_si_003.pdf [file NIHMS420880-supplement-3_si_003.pdf]

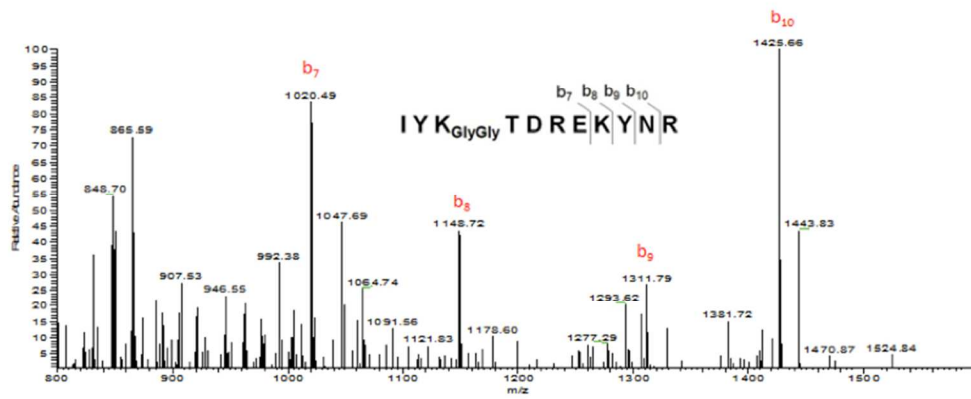

Supporting Figure 3 –  
Product ion spectrum for the doubly charged ubiquitinated peptide IYK<sub>GlyGly</sub>TDREKYNR.

336x214mm (96 x 96 DPI)
