# Supplementary material
Source: PubMed Central journal article supplement (PMC3509807)

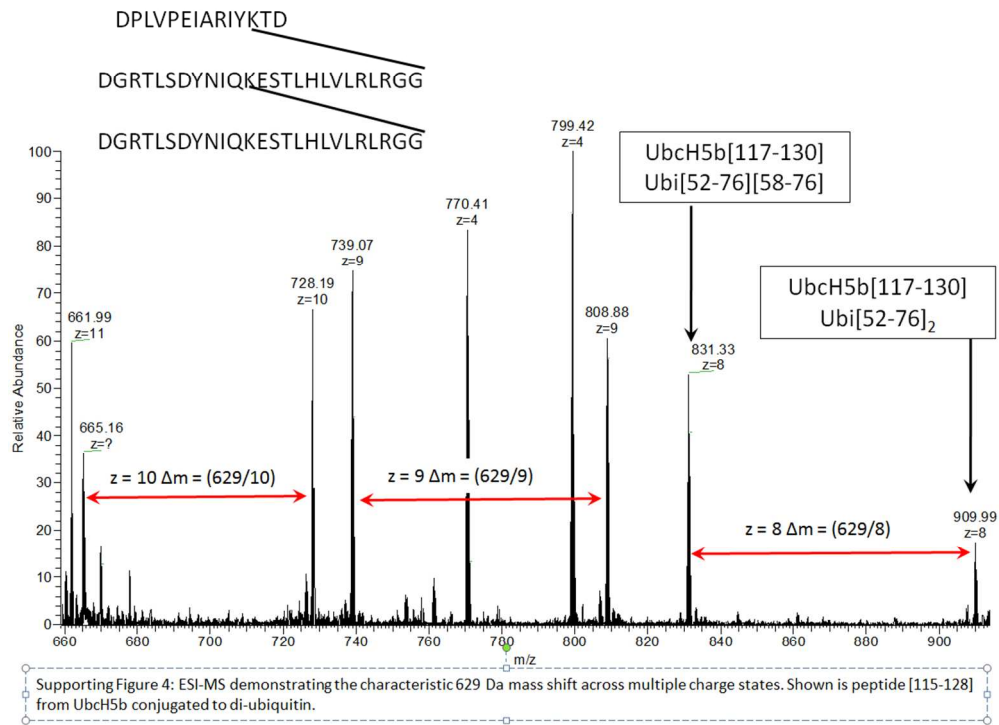

316x238mm (96 x 96 DPI)

Supplement: NIHMS420880-supplement-4_si_004.pdf [file NIHMS420880-supplement-4_si_004.pdf]
